# Supplementary material for: NAAA-regulated lipid signaling in monocytes controls the induction of hyperalgesic priming in mice
Source: PubMed Central journal article supplement (PMC10894261; doi:10.1038/s41467-024-46139-5), 2024-02-24
Supplement: 41467_2024_46139_MOESM1_ESM.pdf [file 41467_2024_46139_MOESM1_ESM.pdf]

## Supplemental material

### **NAAA-regulated lipid signaling in monocytes controls the induction of hyperalgesic priming in mice**

Yannick Fotio<sup>1</sup>, Alex Mabou Tagne<sup>1\*</sup>, Erica Squire<sup>1\*</sup>, Hye-lim Lee<sup>1</sup>, Connor M. Phillips<sup>2</sup>, Kayla Chang<sup>1</sup>, Faizy Ahmed<sup>1</sup>, Andrew S. Greenberg<sup>3</sup>, S. Armando Villalta<sup>2,4</sup>, Vanessa M. Scarfone<sup>5</sup>, Gilberto Spadoni<sup>6</sup>, Marco Mor<sup>7</sup>, and Daniele Piomelli<sup>1,8,9.&</sup>

<sup>1</sup>Department of Anatomy and Neurobiology, University of California Irvine, Irvine, CA, USA.

<sup>2</sup>Department of Physiology and Biophysics, University of California, Irvine, CA, USA

<sup>3</sup>Human Nutrition Research Center, Tufts University, Boston, MA, USA

<sup>4</sup>Department of Neurology, University of California, Irvine, CA, USA

<sup>5</sup>Sue and Bill Gross Stem Cell Research Center, University of California Irvine, CA, USA

<sup>6</sup>Dipartimento di Scienze Biomolecolari, Università di Urbino "Carlo Bo," Urbino, Italy.

<sup>7</sup>Dipartimento di Scienze degli Alimenti e del Farmaco, Università di Parma, Parma, Italy.

<sup>8</sup>Department of Biological Chemistry, University of California Irvine, Irvine, CA, USA.

<sup>9</sup>Department of Pharmaceutical Sciences, University of California Irvine, Irvine, CA, USA.

\* These authors contributed equally

& Corresponding author: Daniele Piomelli (piomelli@hs.uci.edu). Gillespie Neuroscience Res. Facility (room 3101), 837 Health Sciences Rd., Irvine, CA 92697.

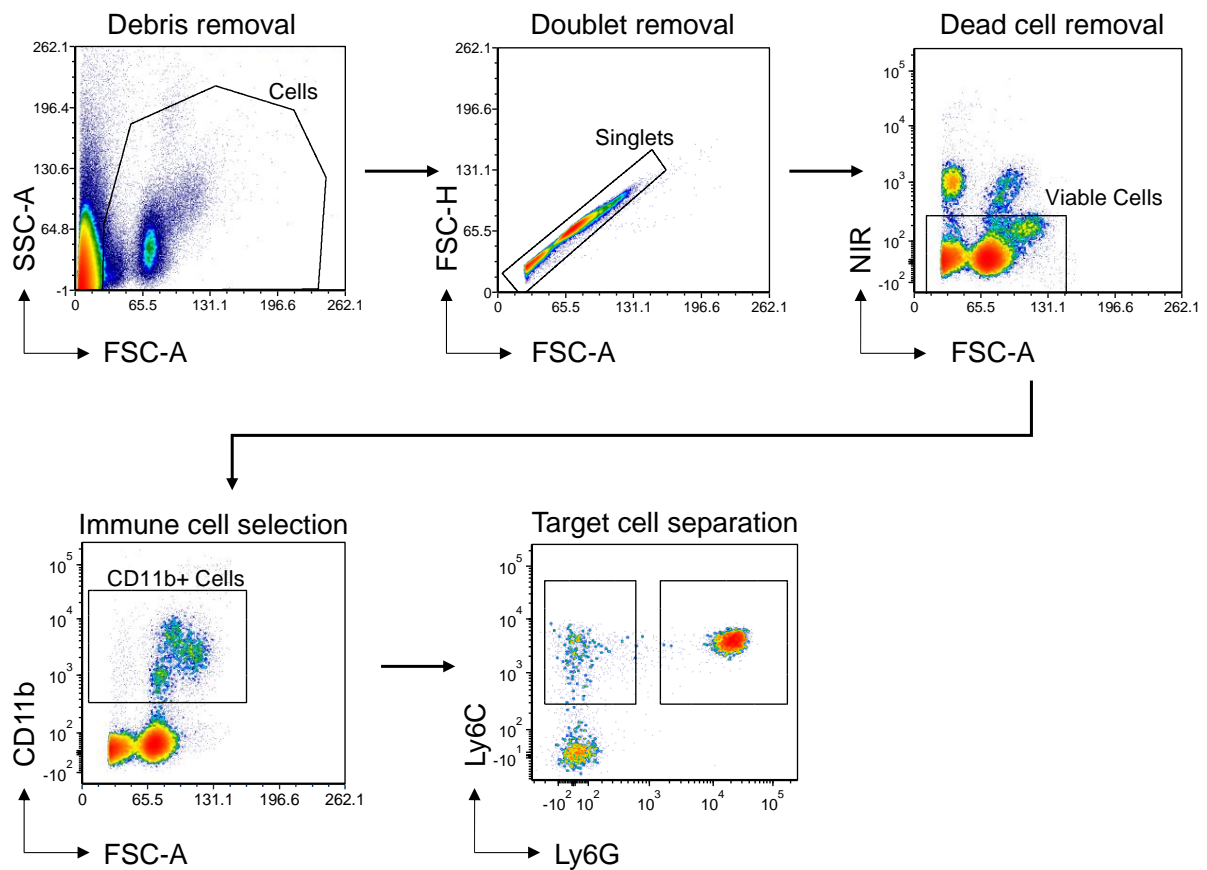

**Figure S1: Debris removal and gating strategy for FACS analyses.**

Tissue debris was removed by gating on the side scatter area (SSC-A) versus forward scatter area (FSC-A). Cells with a high FSC-A/SSC-A ratio were selected and subjected to forward scatter height (FSC-H) versus FSC-A separation to isolate single cells, which displayed a ratio of  $\sim 1$ . After removal of Zombie NIR<sup>+</sup> dead cells, viable single cells were isolated based on expression of marker proteins of interest, including CD11b, CD45, Ly6C, and Ly6G. CD11b<sup>+</sup> Ly6C<sup>high</sup> Ly6G<sup>low</sup> cells were categorized as 'classical' monocytes, CD11b<sup>+</sup> Ly6C<sup>low</sup> Ly6G<sup>low</sup> cells as non-classical monocytes, CD11b<sup>+</sup> Ly6C<sup>high</sup> Ly6G<sup>high</sup> as neutrophils, and CD11b<sup>+</sup> CD45<sup>low</sup> as spinal cord microglia (not shown)<sup>36,37</sup>.

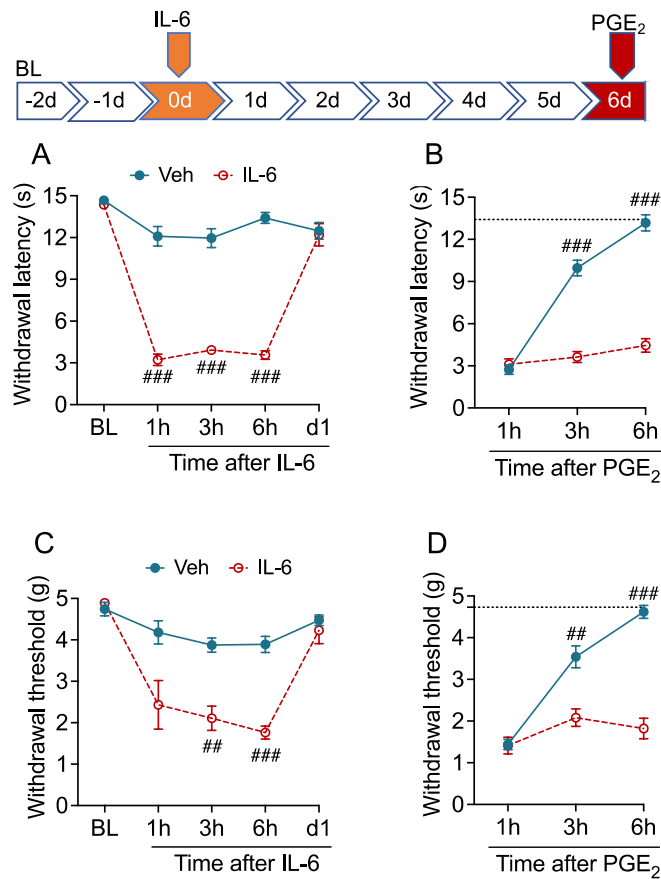

**Figure S2: HP model used in the present experiments.** Male mice were given intraplantar injections (right hind paw) of a priming agent (e.g., IL-6; n=7) or its vehicle (n=8) on day 0 of the experiment and nociception (**A**: ipsilateral heat hypersensitivity, paw withdrawal latency in seconds; **C**: ipsilateral mechanical hypersensitivity, paw withdrawal threshold in grams) was assessed for the following 24 hours. Six days later, the algogenic prostanoid PGE<sub>2</sub> was administered in the same paw and hypersensitivity (**B**: heat; **D**: mechanical) was measured for the following 6 hours.

Data are expressed as mean  $\pm$  S.E.M. and were analyzed by two-way repeated measure ANOVA followed by Bonferroni's multiple comparison test. P values versus vehicle are shown. Dotted lines indicate baseline withdrawal latency. Source data are provided as a Source Data file.

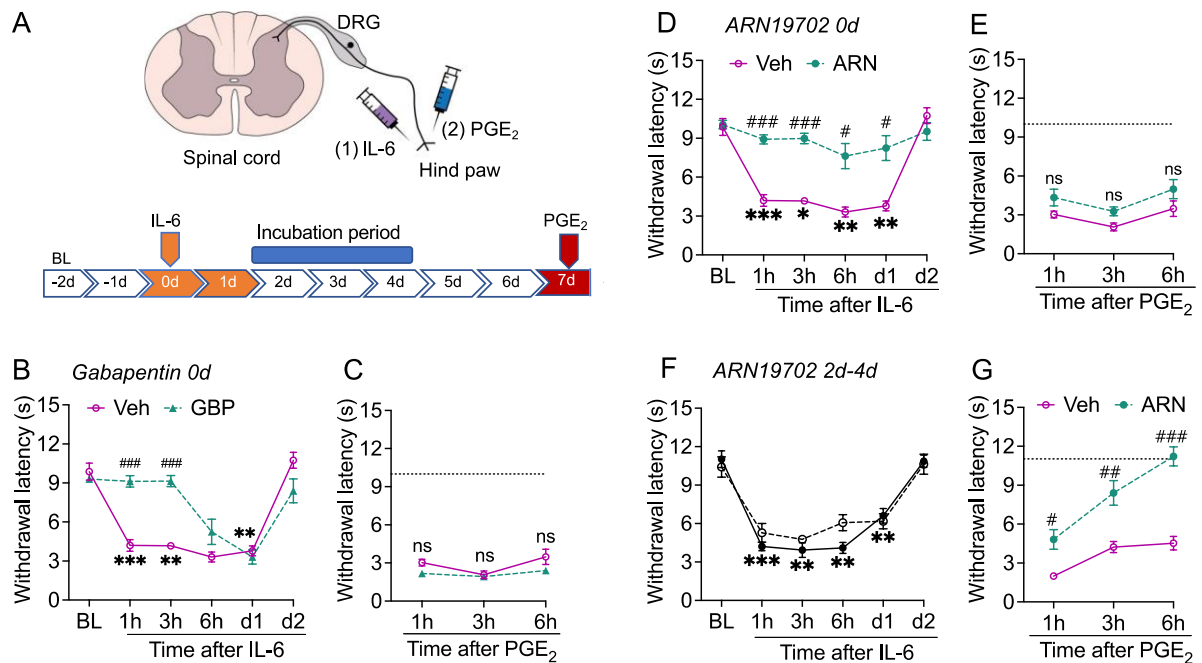

**Figure S3: NAAA is required for HP induction in female mice.**

(A) Protocol used in the present experiments. Priming was induced in female mice by intraplantar administration of IL-6 and was assessed 6 days later by injecting PGE<sub>2</sub> at the same site. Ipsilateral heat hypersensitivity (paw withdrawal latency, s) was measured under baseline (BL) conditions (-2d, -1d) and immediately after administration of IL-6 (0d), PGE<sub>2</sub> (7d), or vehicle (0d and 7d). The blue bar marks the HP incubation period. Compared to males, female mice exhibited a longer response to IL-6 (see B, below). For this reason, gabapentin and ARN19702 administrations were conducted on 2d-4d and PGE<sub>2</sub> injection on 7d.

(B-E) Heat hypersensitivity after IL-6 injection in female mice (n=6-7 per group) that had received gabapentin (GBP, 50 mg·kg<sup>-1</sup>; green triangles, B), ARN19702 (ARN, 30 mg·kg<sup>-1</sup>; green circles, D), or their vehicle (Veh, magenta circles) 1 h before IL-6. Effect of PGE<sub>2</sub> in mice treated with GBP (C, n=6), ARN19702 (E, n=7), or their respective vehicles (n=6).

(F, G) IL-6-primed mice were treated on 1d-3d with vehicle (n=6) or ARN19702 (30 mg·kg<sup>-1</sup>; n=9). (F) Hypersensitive response to IL-6 before administration of vehicle (open symbols) or ARN19702 (closed symbols). (G) Effects of PGE<sub>2</sub> in IL-6-primed mice that had received vehicle (magenta circles) or ARN19702 (green triangles).

Data are presented as mean ± S.E.M. and were analyzed by two-way repeated measure ANOVA followed by Bonferroni's multiple comparison test. \*\*\*P < 0.001, \*\*P < 0.01, \*P < 0.05, versus baseline; ####P < 0.001, ###P < 0.01, #P < 0.05, versus vehicle or Wt. ns, non-significant.

P values versus vehicle are indicated, when possible. Dotted lines indicate baseline withdrawal latency. Source data are provided as a Source Data file.

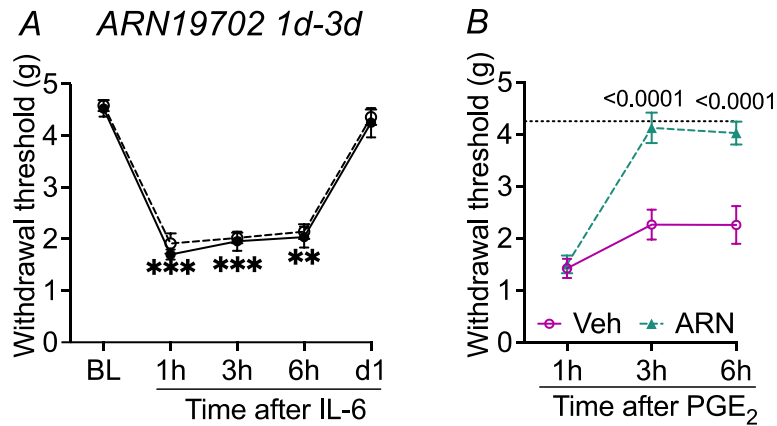

**Figure S4: NAAA is required for HP initiation. Effect of ARN19702 on mechanical hypersensitivity.**

Priming was induced in male mice by intraplantar administration of IL-6 and was assessed 6 days later by injecting PGE<sub>2</sub> at the same site. Ipsilateral mechanical hypersensitivity (paw withdrawal threshold in grams) was measured under baseline (BL) conditions (-2d, -1d) and immediately after administration of IL-6 (0d), PGE<sub>2</sub> (6d), or vehicle (0d and 6d).

(A) Self-resolving mechanical hypersensitivity elicited by IL-6.

(B) Effects of PGE<sub>2</sub> on mechanical hypersensitivity in IL-6-primed mice treated with ARN19702 (n=8) or its vehicle (n=7) on day 1-3 following IL-6 challenge.

Data are presented as mean  $\pm$  S.E.M. and were analyzed by two-way repeated measure ANOVA followed by Bonferroni's multiple comparison test. \*\*\*P < 0.001, \*\*P < 0.01, versus baseline. P values versus vehicle are shown, when possible. Dotted lines indicate baseline withdrawal latency. Source data are provided as a Source Data file.

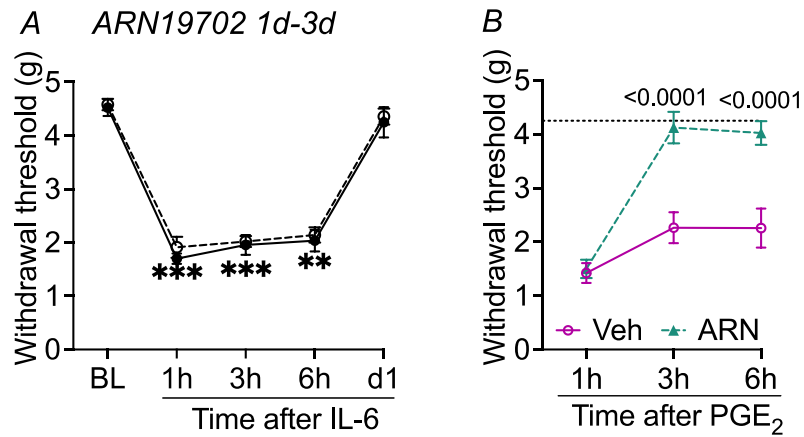

**Figure S5: Gabapentin does not prevent HP induction.**

(A) Response to IL-6 before administration of vehicle (open black circles) or gabapentin (closed black triangles). No differences among groups were observed.

(B) Effects of PGE<sub>2</sub> in IL-6-primed mice that had received vehicle (Veh, magenta circles) or gabapentin (GBP, green triangles) on 1d-3d after IL-6.

Data are presented as mean  $\pm$  S.E.M. and were analyzed by two-way repeated measure ANOVA followed by Bonferroni's multiple comparison test. \*\*\*P < 0.001, versus baseline (n = 7 mice per group). Dotted line indicates baseline withdrawal latency. Source data are provided as a Source Data file.

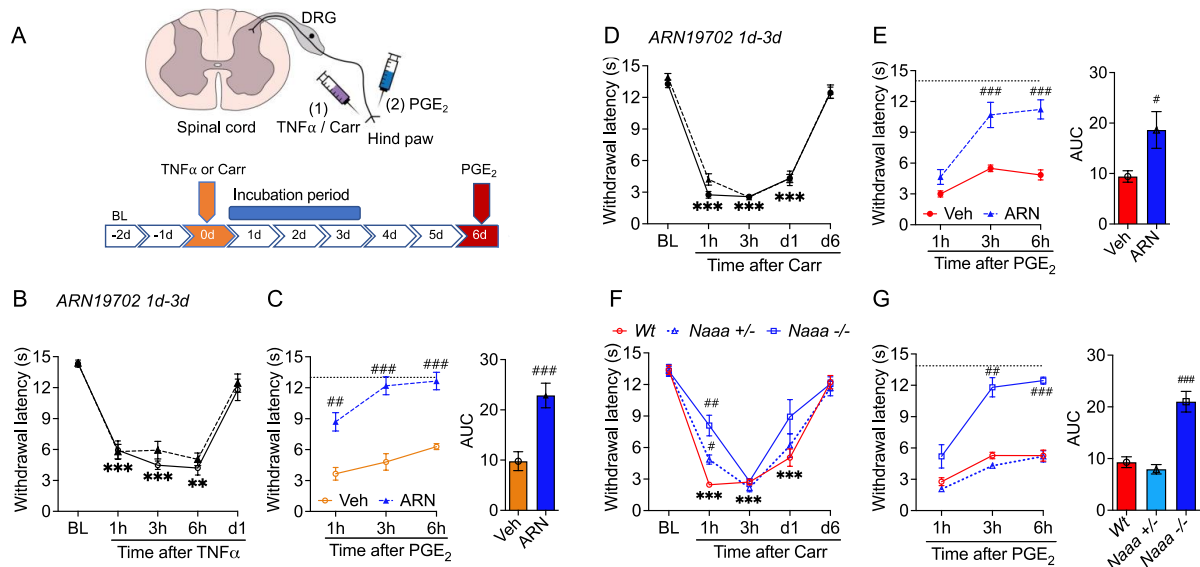

**Figure S6: NAAA is required for HP induction by TNF $\alpha$  or carrageenan.**

(A) Model used in the present experiments. Priming was induced in male mice by intraplantar administration of either TNF $\alpha$  or carrageenan (Carr) and was assessed 6 days later by injecting PGE<sub>2</sub> at the same site. Ipsilateral heat hypersensitivity (paw withdrawal latency, s) was measured under baseline (BL) conditions (-2d, -1d) and immediately after administration of the priming stimulus (0d), PGE<sub>2</sub> (6d), or vehicle (0d and 6d). The blue bar marks the HP incubation period. The illustration was partially generated with BioRender.com

(B, C) TNF $\alpha$ -primed mice were treated on 1d-3d with vehicle or ARN19702 (30 mg·kg<sup>-1</sup>). (B) Response to IL-6 before administration of vehicle (open black circles, n=8) or ARN19702 (closed black triangles, n=8). (C) Effects of PGE<sub>2</sub> in TNF- $\alpha$ -primed mice that had received vehicle (Veh, orange circles) or ARN19702 (blue triangles). Right panel, area under the curve (AUC).

(D, E) Carrageenan-primed mice were treated on 1d-3d with vehicle or ARN19702 (30 mg·kg<sup>-1</sup>). (D) Response to IL-6 before administration of vehicle (closed black circles, n=10) or ARN19702 (closed black triangles, n=12). (E) Effects of PGE<sub>2</sub> in carrageenan-primed mice that had received vehicle (red circles) or ARN19702 (blue triangles).

(F) Heat hypersensitivity after carrageenan injection in homozygous *Naaa*<sup>-/-</sup> mice (blue triangles, n=7), heterozygous *Naaa*<sup>+/-</sup> mice (blue squares, n=8), and their wild-type littermates (red circles, n=7). (G) Effects of PGE<sub>2</sub> in the same animals. Right panel, AUC.

Data are presented as mean  $\pm$  S.E.M. and were analyzed by two-tailed unpaired Student's *t* test (AUC) or two-way repeated measure ANOVA followed by Bonferroni's multiple comparison test. \*\*\*P < 0.001, \*\*P < 0.01, versus baseline; ##P < 0.01, #P < 0.05, versus Wt.



P values versus *Wt* or vehicle are shown, when possible. Dotted lines indicate baseline withdrawal latency. Source data are provided as a Source Data file.

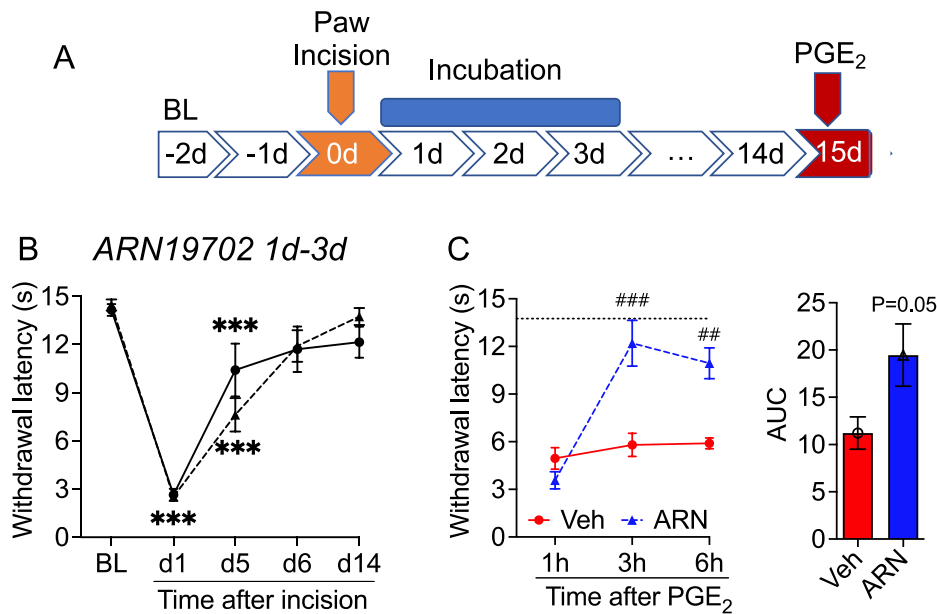

**Figure S7: NAAA is required for HP induction by paw incision.**

(A) Model used in the present experiments. Priming was induced in male mice with a surgical incision of the plantar aspect of the right hind paw and was assessed 15 days later by injecting PGE<sub>2</sub> at the same site. Ipsilateral heat hypersensitivity (paw withdrawal latency, s) was measured under baseline (BL) conditions (-2d), immediately after administration of the priming stimulus (0d) or PGE<sub>2</sub> (15d). The blue bar marks the HP incubation period during which mice received ARN19702 (30 mg·Kg<sup>-1</sup>) or its vehicle.

(B) Nociceptive response after the incision and before administration of vehicle (closed black circles, n=7) or ARN19702 (closed black triangles, n=8).

(C) Effects of PGE<sub>2</sub> in incision-primed mice that had received vehicle (Veh, red circles) or ARN19702 (blue triangles). Right panel, area under the curve (AUC).

Data are presented as mean ± S.E.M. and were analyzed by two-way repeated measure ANOVA followed by Bonferroni's multiple comparison test or two-tailed unpaired Student's *t* test (AUC). P values versus baseline (BL) or vehicle are shown. Dotted lines indicate baseline withdrawal latency. Source data are provided as a Source Data file.

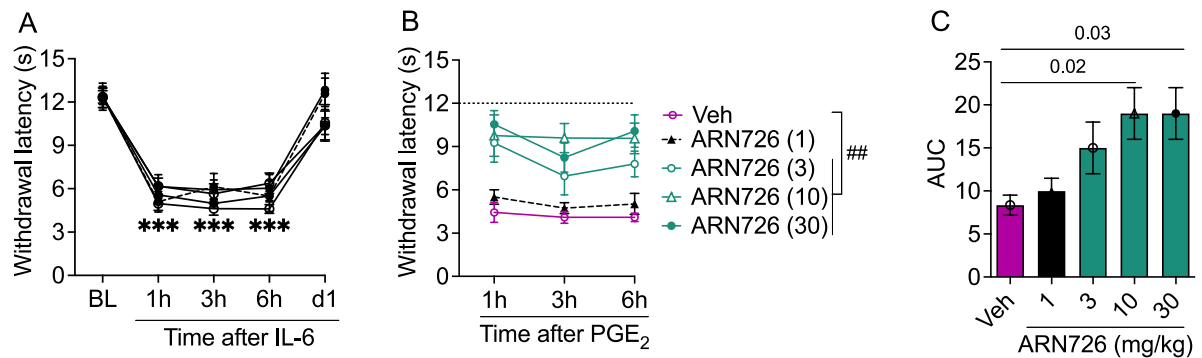

**Figure S8: Systemic ARN726 administration prevents HP induction.**

(A) Response to IL-6 before administration (black symbols) of vehicle or ARN726. No differences among groups were observed.

(B) Effects of PGE<sub>2</sub> injection in IL-6-primed mice treated (IP) with vehicle (magenta circles, n=6) or ARN726 at the following doses: 1 mg·kg<sup>-1</sup> (black triangles, n=8); 3 mg·kg<sup>-1</sup> (open green circles, n=8); 10 mg·kg<sup>-1</sup> (green triangles, n=8); and 30 mg·kg<sup>-1</sup> (closed green circles, n=7).

(C) Area Under the Curve (AUC) of the effects of PGE<sub>2</sub> in primed animals.

Data are shown as mean ± S.E.M. and were analyzed by one-way (AUC) or two-way repeated measure ANOVA, followed by Dunnett's or Bonferroni's multiple comparison test. \*\*\*P < 0.001, versus baseline (BL); ##P < 0.01 versus vehicle. P values versus vehicle are shown, when possible. Dotted line indicates baseline withdrawal latency. Source data are provided as a Source Data file.

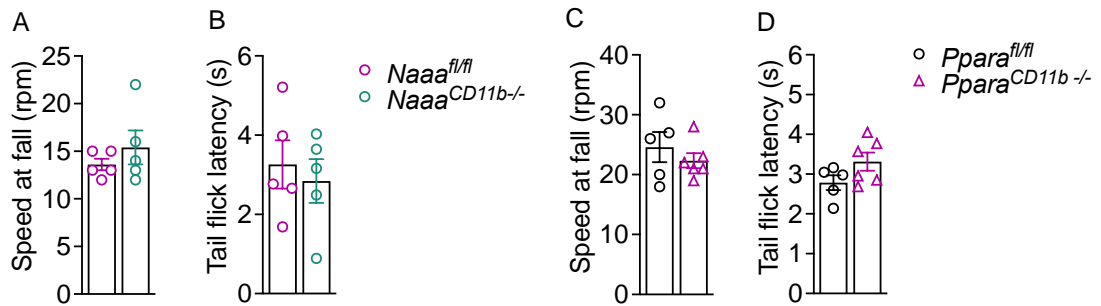

**Figure S9: Motor coordination and baseline nociceptive thresholds in CD11b<sup>+</sup> cell-selective *Naaa*<sup>-/-</sup> and *Ppara*<sup>-/-</sup> mice.**

(A, C) No differences in motor coordination were seen across mouse lines. *Naaa*<sup>fl/fl</sup> and *Ppara*<sup>fl/fl</sup>, animals lacking *Naaa* or *Ppara* in CD11b<sup>+</sup> cells did not show a difference in the speed at fall [in rotation per min (rpm)] in the accelerated rotarod test.

(B, D) No differences were observed in baseline nociceptive thresholds across mouse lines. *Naaa*<sup>fl/fl</sup>, magenta circles; *Ppara*<sup>fl/fl</sup>, open black circles; *Naaa*<sup>CD11b<sup>-/-</sup></sup>, green circles; *Ppara*<sup>CD11b<sup>-/-</sup></sup>, magenta triangles.

Data are shown as mean ± S.E.M. and were analyzed using Student's *t* test (n = 5). Source data are provided as a Source Data file.

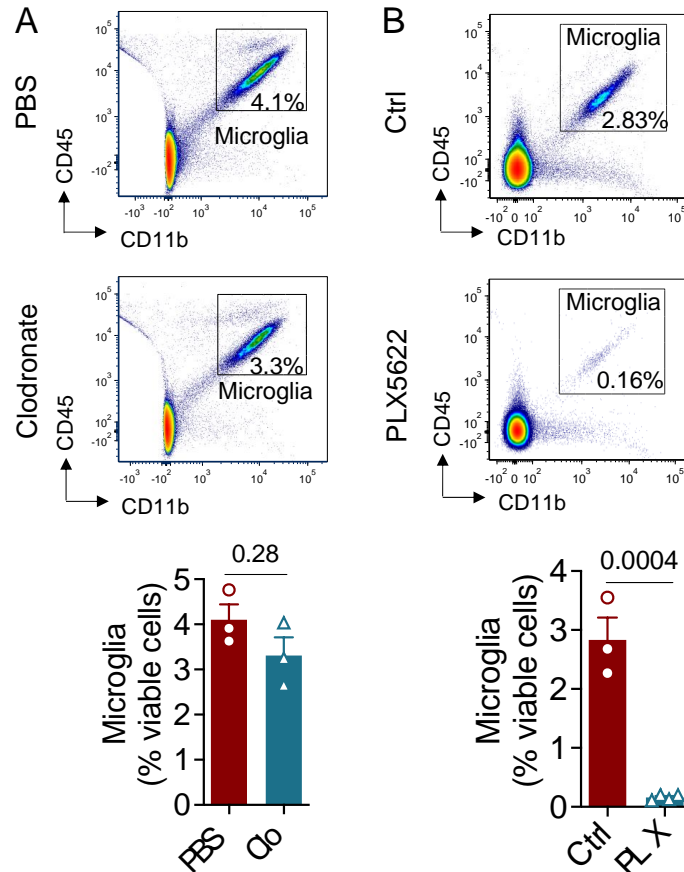

**Figure S10: FACS analysis of spinal cord microglia.**

(A) Gating strategy for isolation and quantification of spinal cord microglia from PBS- and clodronate-treated mice. *Top*, CD11b<sup>+</sup>CD45<sup>low</sup> populations of microglia from a mouse after PBS treatment ( $\approx 4.1\%$ ). *Bottom*: clodronate treatment did not significantly alter the number of microglia ( $\approx 3.3\%$ ).

(B) Gating strategy for isolation and quantification of spinal cord microglia from mice fed chow containing vehicle (Ctrl) or PLX5622 (PLX) for 20 days. *Top*, population of CD11b<sup>+</sup>CD45<sup>low</sup> microglia in the spinal cord of a Ctrl mouse. *Bottom*, PLX depleted microglia by approximately 94%. Data are representative of three biological replicates. They are shown as mean  $\pm$  S.E.M. and were analyzed by unpaired two-tailed Student's *t* test. P value versus Ctrl is indicated. Source data are provided as a Source Data file.

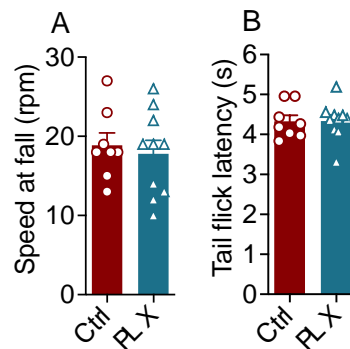

**Figure S11: Motor coordination and baseline nociceptive thresholds in mice treated with CSF-1 receptor antagonist PLX5622.**

(A) No differences in motor coordination were observed across groups. Mice fed chow containing vehicle (Ctrl, red bars, n=8) or PLX5622 (PLX, blue bars, n=10) for 20 days did not show a difference in the speed at fall [in rotation per min (rpm)] in the accelerated the rotarod test.

(B) Baseline nociceptive thresholds. PLX-treated mice and their control (Ctrl) counterparts did not exhibit any difference in tail flick latency (s) during the tail immersion test.

Data are shown as mean ± S.E.M. and were analyzed using two-tailed unpaired Student's *t* test. Source data are provided as a Source Data file.

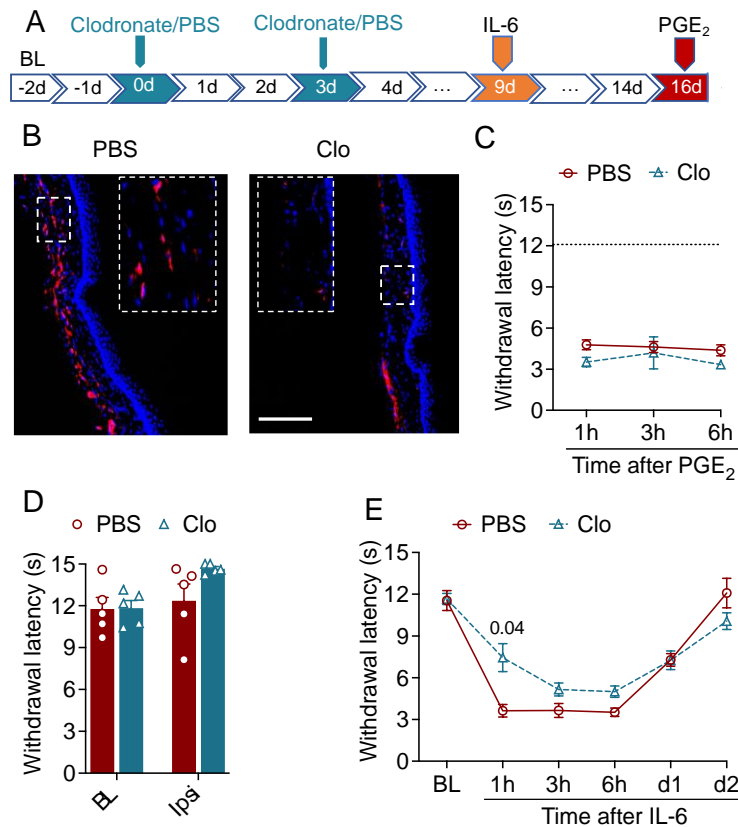

**Figure S12: Effects of intraplantar clodronate injection on HP induction.**

(A) Protocol used in the present experiments. Liposomes containing clodronate (Clo) or vehicle (PBS) were injected in the mouse right hind paw on day 0 and again on day 3 of the experiment. IL-6 and PGE<sub>2</sub> were administered in the same paw six days and 13 days later, respectively.

(B) Immunofluorescent images showing CD68+ cell bodies (red) and DAPI-stained nuclei (blue) in paws treated with PBS (left) or clodronate (right) six days earlier. Magnification, x10. Hatched squares show highlighted areas at higher magnification (x40). Scale bar, 200  $\mu$ m. Results were obtained in three independent biological replicates. Representative images are shown here.

(C) Nociceptive responses (heat hypersensitivity, withdrawal latency, s) to intraplantar PGE<sub>2</sub> injection in paws treated with PBS (red circles, n=6) or clodronate liposomes (blue triangles, n=7).

(D) Baseline nociceptive responses (paw withdrawal latency, s) in paws treated with PBS (red circles/bars, n=5) or clodronate liposomes (blue triangles/bars, n=5).

(E) Nociceptive responses (heat hypersensitivity) to intraplantar IL-6 injection in paws treated with PBS (red circles, n=6) or clodronate liposomes (blue triangles, n=7).

Data are shown as mean  $\pm$  S.E.M. and were analyzed by multiple unpaired two-tailed *t* test or two-way repeated measure ANOVA, followed by Bonferroni's multiple comparison. P value

versus PBS is shown. Dotted line indicates baseline withdrawal latency. Source data are provided as a Source Data file.

| Name                | Fluorophore          | Source     | Clone  | Dilution | Cat #      |
|---------------------|----------------------|------------|--------|----------|------------|
| Anti-CD45 antibody  | PE-Cyanine7          | Invitrogen | 30-F11 | 1:50     | 25-0451-82 |
| Anti-CD11b antibody | Brilliant Violet 421 | Biolegend  | M1/70  | 1:50     | 101236     |
| Anti-Ly6C antibody  | APC                  | Biolegend  | HK1.4  | 1:50     | 128016     |
| Anti-Ly6G antibody  | PE                   | Biolegend  | 1A8    | 1:50     | 127608     |
| Zombie NIR          | APC-Cy7              | Biolegend  | N/A    | 1:100    | 423106     |

**Table S1: Reagents used for FACS analysis.**

| PK parameters of ARN726                   |        |
|-------------------------------------------|--------|
| $C_{max}$ (ng-mL <sup>-1</sup> )          | 333.82 |
| $T_{max}$ (min)                           | 15     |
| $K_{el}$ (h <sup>-1</sup> )               | 2.9    |
| $t_{1/2}$ (min)                           | 15     |
| $AUC_{plasma}$ (h x ng-mL <sup>-1</sup> ) | 63.33  |

**Table S2: Pharmacokinetic profile of ARN726 in mice.**

ARN726 was administered to male mice (10 mg·kg<sup>-1</sup>, IP).  $C_{max}$ , maximal plasma concentration;  $T_{max}$ , time at which  $C_{max}$  is reached;  $K_{el}$ , elimination rate constant;  $t_{1/2}$ , half-life of elimination; AUC, area under the curve. Data are the average of 5 biological replicates.

| Target            | Antibody<br>Clone | Supplier  | Metal Mass | Element | Concentration<br>(ug/ml) |
|-------------------|-------------------|-----------|------------|---------|--------------------------|
| CD44              | IM7               | Biolegend | 106        | Cd      | 1                        |
| CD14              | Sa14-2            | Biolegend | 110        | Cd      | 4                        |
| CD39              | 24DMS1            | Biolegend | 111        | Cd      | 4                        |
| CD64              | X54-5/7.1         | Biolegend | 113        | Cd      | 4                        |
| IFN $\gamma$      | XMG1.2            | Biolegend | 114        | Cd      | 1                        |
| CD45              | 30-F11            | Biolegend | 116        | Cd      | 1                        |
| Ly <sub>6</sub> G | 1A8               | Biolegend | 141        | Pr      | 2                        |
| Ly-6C/G           | RB6-8C5           | Biolegend | 142        | Nd      | 2                        |



|                    |              |              |     |    |   |
|--------------------|--------------|--------------|-----|----|---|
| MerTK              | DS5MMER      | Invitrogen   | 144 | Nd | 4 |
| F4/80              | BM8          | Biolegend    | 146 | Nd | 4 |
| TNFa               | MP6-XT22     | Biolegend    | 147 | Sm | 1 |
| Ly_6C              | HK.14        | Biolegend    | 150 | Nd | 2 |
| CD62L              | HK.14        | Biolegend    | 151 | Eu | 4 |
| CD73               | TY/11.8      | Biolegend    | 152 | Sm | 4 |
| CD43               | Polyclonal   | Invitrogen   | 153 | Eu | 4 |
| CD38               | 90           | Biolegend    | 154 | Sm | 4 |
| CD11a              | M17/4        | Biolegend    | 155 | Gd | 2 |
| CD68               | FA-11        | Biolegend    | 156 | Gd | 1 |
| IL-17A             | TC11-18H10.1 | Biolegend    | 159 | Tb | 1 |
| pCREB              | E113         | Abcam        | 160 | Gd | 1 |
| IL-6               | MP5-20F3     | Biolegend    | 161 | Dy | 1 |
| CD163              | Polyclonal   | Bioss        | 163 | Dy | 4 |
| CD161<br>NK1.1     | PK136        | Biolegend    | 164 | Dy | 2 |
| CX3CR1             | polyclonal   | R&D Systems  | 166 | Er | 4 |
| CD115<br>(CSF1R)   | AFS98        | Invitrogen   | 167 | Er | 4 |
| PPARa              | Polyclonal   | Bioss        | 168 | Er | 1 |
| CD206              | C068C2       | Fluidigm/SBT | 169 | Tm | 4 |
| Iba1               | Polyclonal   | Wako         | 170 | Er | 1 |
| Mac2_Gal3          | M3/38        | Cedarlane    | 171 | Yb | 4 |
| CD11b              | M1/70        | Biolegend    | 172 | Yb | 2 |
| CCR2               | Polyclonal   | Invitrogen   | 174 | Yb | 4 |
| I-A/I-E<br>(MHCII) | MS/114.15.2  | Fluidigm/SBT | 175 | Lu | 2 |
| CD11c              | N418         | Fluidigm/SBT | 209 | Bi | 2 |

**Table S3: Reagents used for CyTOF.**
